# Supplementary material for: Step-scheme CsPbBr3/BiOBr photocatalyst with oxygen vacancies for efficient CO2 photoreduction
Source: Royal Society of Chemistry journal article supplement (doi:10.1039/d4dt01214c), 2024-01-01
Supplement: d4dt01214c1.pdf [file d4dt01214c1.pdf]

## Supporting Information

### Step-scheme photocatalyst of CsPbBr<sub>3</sub>/BiOBr with oxygen vacancy for efficient CO<sub>2</sub> photoreduction

Wanjun Sun,<sup>\*a,c</sup> Jifei Liu,<sup>a</sup> Feitian ran,<sup>a</sup> Na Li,<sup>\*a</sup> Zengpeng Li,<sup>c</sup> Yuanyuan  
Li,<sup>\*b</sup> Kai Wang<sup>\*a</sup>

<sup>a</sup> School of New Energy and Power Engineering, Lanzhou Jiaotong  
University, Lanzhou, Gansu, 730070, China

<sup>b</sup> Department of Biological and Chemical Engineering, Chongqing  
University of Education, Chongqing 400067, China.

<sup>c</sup> Key Laboratory of Solar Power System Engineering, Jiuquan  
Vocational and Technical College, Jiuquan, 735000, China

Corresponding author.

E-mail addresses: wanjunsun@mail.lzjtu.cn, lin19@lzu.edu.cn,  
liyy@cque.edu.cn, wangk@mail.lzjtu.cn

## Materials

Bismuth nitrate pentahydrate ( $\text{Bi}(\text{NO}_3)_3 \cdot 5\text{H}_2\text{O}$ ) and ethylene glycol ( $((\text{CH}_2\text{OH})_2)$ ) were purchased from Aladdin. Potassium bromide (KBr), polyvinylpyrrolidone (PVP, M.W. 30K), CsBr,  $\text{PbBr}_2$ , oleylamine, oleic acid and N, N-Dimethylformamide (DMF) were obtained from Energy Chemical Reagent. All chemicals were of analytical grade purity.

## Characterization

The crystalline phase of the samples was characterized by X-ray diffraction (XRD, Bruker D8 X, Germany) which was equipped with Cu-K $\alpha$ . The morphology and microstructure of the as-prepared samples were detected by scanning electron microscopy (SEM, Zeiss Gemini 500) and transmission electron microscope (TEM) (FEI Tecnai F30). Elemental analysis of the sample was determined on TJA ICP-atomic emission spectrometer (IRIS Advantage ER/S). High resolution X-ray photoelectron spectroscopy (XPS) data were measured using Axis Supra® and the binding energy of all the elements were corrected by the C 1s peak (284.8 eV). UV-vis diffuse reflectance spectra (UV-vis DRS) were recorded on a Shimadzu UV-2600 spectrophotometer equipped with integrating spheres. The electron paramagnetic resonance (EPR) spectra were obtained on a Bruker EMXPlus Spectrometer.

## Photoelectrochemical measurements

The working electrode was fluorine doped tin oxide (FTO) glass coated with sample aqueous solution. First, 5 mg of catalyst was dispersed in 1 mL of tetrabutylammonium hexafluorophosphate (TBAPF<sub>6</sub>)/ethyl acetate solution by sonication for 1 h to obtain a slurry. Then, 100  $\mu$ L slurry were dropped onto a 1 cm  $\times$  2 cm FTO glass electrode. The FTO glass was dried at 60  $^{\circ}$ C for 30 min. Afterwards, 10  $\mu$ L 0.5% Nafion was deposited on the working electrode to enhance improve the adhesion. All photoelectrochemical measurements were performed on a CHI 660D workstation (CH Instruments Co.) under irradiation of a 300 W Xe lamp (AM1.5G, and 100 mW cm<sup>-2</sup>) at open circuit voltage. A standard three-electrode cell was employed with a Pt wire as the counter electrode and an Ag/AgCl electrode as the reference electrode. 0.05 M tetrabutylammonium hexafluorophosphate (TBAPF<sub>6</sub>)/ethyl acetate solution was filled in the quartz cell as the electrolyte. I-t curves were carried out at a bias potential of 0.1 V vs. Ag/AgCl. Electrochemical impedance spectroscopy (EIS) was conducted under a frequency range of 0.01-10<sup>5</sup> Hz.

### Calculation of the lifetime of the photogenerated carrier

The decay curves obtained from TRPL can be well fitted by the following three-exponential equation:

$$I(t) = I_0 + A_1 \exp(-t/\tau_1) + A_2 \exp(-t/\tau_2) + A_3 \exp(-t/\tau_3)$$

where the  $I_0$  represents the baseline correction value,  $A_1$ ,  $A_2$ , and  $A_3$  are the pre-exponential factors, and  $\tau_1$ ,  $\tau_2$  represent the lifetime of the radiant energy transfer process (ns), while  $\tau_3$  represents the lifetime of the non-radiative energy transfer process (ns). The average lifetime ( $\tau_{ave}$ ) can be calculated according to the following equation:

$$\tau_{ave} = (A_1 \tau_1^2 + A_2 \tau_2^2 + A_3 \tau_3^2) / (A_1 \tau_1 + A_2 \tau_2 + A_3 \tau_3)$$

## Computational detail

DFT calculations were conducted through the Vienna ab initio Simulation Package (VASP) with the projector augment wave method [1, 2]. Generalized gradient approximation of the Perdew-Burke-Ernzerhof (PBE) functional was used as the exchange-correlation functional [3]. The Brillouin zone was sampled with  $2 \times 2 \times 1$  K points for surface calculation [4]. The cutoff energy was set as 500 eV, and structure relaxation was performed until the convergence criteria of energy and force reached  $1 \times 10^{-5}$  eV and  $0.02 \text{ eV } \text{\AA}^{-1}$ , respectively. A vacuum layer of  $15 \text{ \AA}$  was constructed to eliminate interactions between periodic structures of surface models. The van der Waals (vdW) interaction was amended by the zero damping DFT-D3 method of Grimme [5].

The adsorption energy ( $\Delta E_{\text{ads}}$ ) of adsorbate adsorption on surface is defined as:  $\Delta E_{\text{ads}} = E(*\text{adsorbate}) - E(*) - E(\text{adsorbate})$

where  $E(*\text{adsorbate})$  and  $E(*)$  are the total energy of surface systems with and without adsorbate, respectively,  $E(\text{adsorbate})$  is the energy of an isolated adsorbate. According to this definition, negative adsorption energy suggests that the adsorption process is exothermic and the adsorption system is thermodynamically stable. Contrarily, a positive value corresponds to an endothermic and unstable adsorption.

### ***In-situ DRIFT measurements***

In-situ DRIFT experiment was performed on a Bruker Vertex 70 Fourier Transform Infrared Spectrometer. The prepared sample was placed in a reaction cell and pretreated with argon gas at 150 °C for 30 min to remove impurities. Then the reaction cell was cooled to room temperature, the background spectrum was taken, and then the mixture of CO<sub>2</sub> and water vapor was passed into the reaction cell for adsorption. After 20 min, 300 W Xe lamp with an optical cutoff filter ( $\lambda > 420$  nm) were applied to irradiate, and FTIR spectra were collected over time.

## **Femtosecond transient absorption (fs-TA) measurements**

For fs-TA spectroscopy, the laser source was a Coherent Legend Elite regenerative amplifier (<110 fs, 1 KHz, 800 nm) that was seeded by a Coherent Chameleon oscillator (75 fs, 80 MHz). The white probe pulses in 330-600 nm range were generated on a CaF<sub>2</sub> crystal excited by partial of the 800-nm laser beam from the amplifier. The 300 nm and 440 nm pump pulse were generated from a Light Conversion OPerA-Solo optical parametric amplifier (285-2600 nm). The polarization between 300-nm pump and probe was set at the magic angle of 54.7° or the pump was directly depolarized (for pump>350 nm) to remove the artifacts of orientational relaxation. The data were fitted using Surface Xplore software (Ultrafast Systems, LLC). The samples were stored in a quartz cuvette for TA measurement. All of the measurements were performed at room temperature unless otherwise specified.

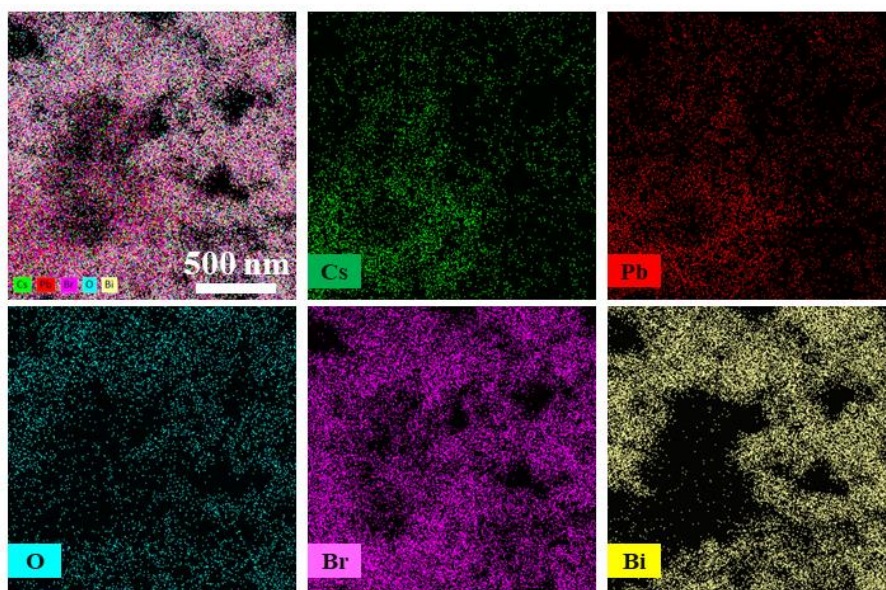

**Fig. S1.** EDS mappings of CsPbBr<sub>3</sub>/BiOBr-Ov.

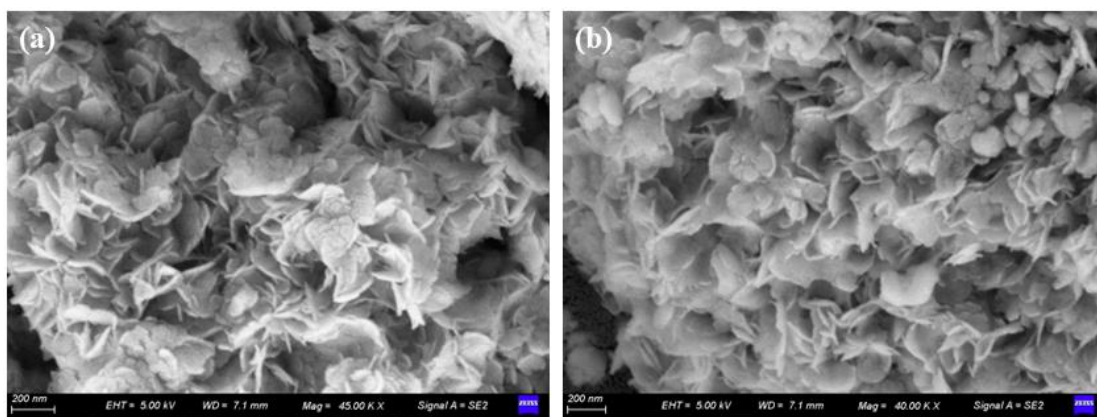

**Fig. S2.** The SEM images of (a) BiOBr-Ov and (b) CsPbBr<sub>3</sub>/BiOBr-Ov-2, respectively.

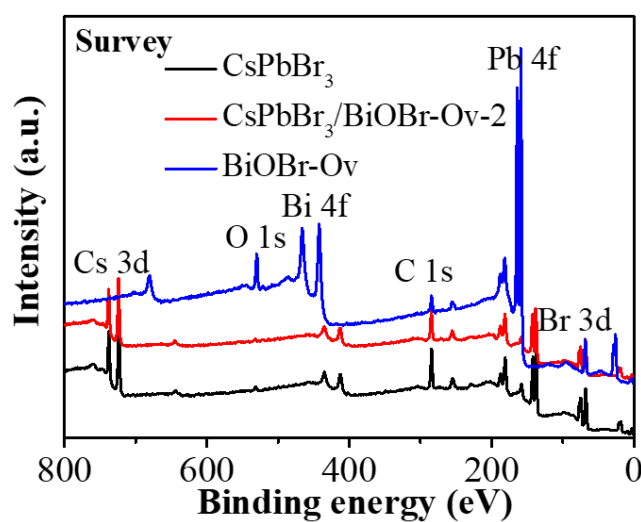

**Fig. S3.** XPS spectra of survey scan of CsPbBr<sub>3</sub>, BiOBr-Ov and CsPbBr<sub>3</sub>/BiOBr-Ov-2, respectively.

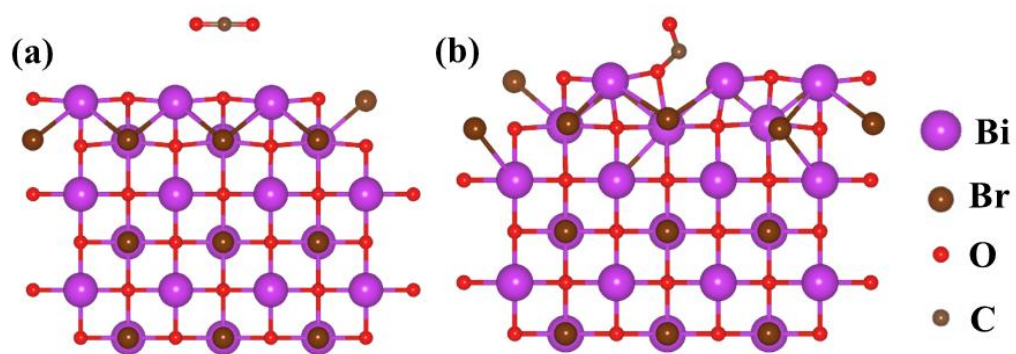

**Fig. S4.** Top view the optimized (a) BiOBr, (b) BiOBr-Ov adsorbed with CO<sub>2</sub>.

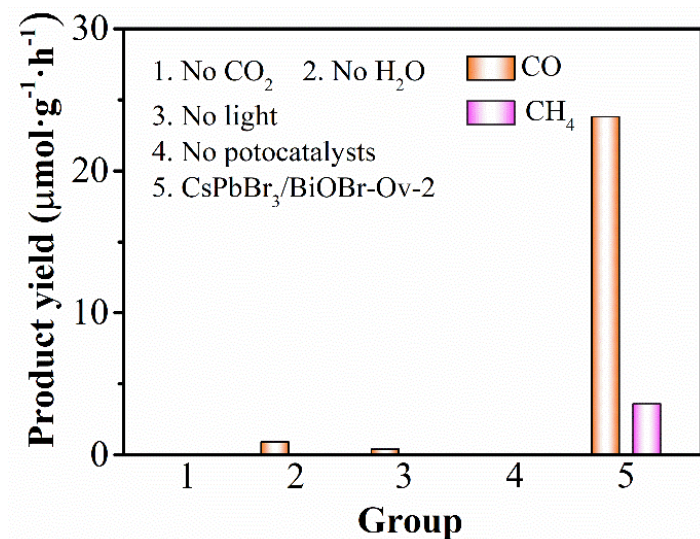

**Fig. S5.** CO<sub>2</sub> photoreduction performance under different conditions.

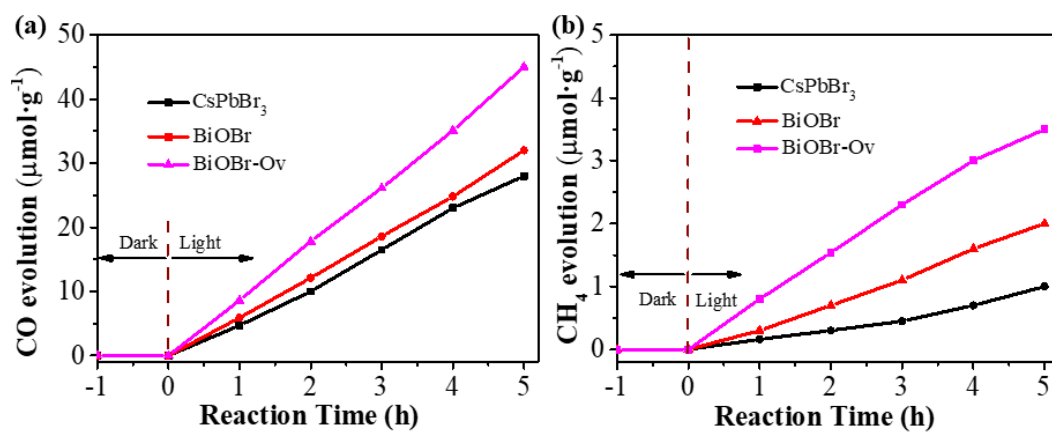

**Fig. S6.** Time-dependent of photocatalytic (a) CO and (b) CH<sub>4</sub> production over CsPbBr<sub>3</sub>, BiOBr, and BiOBr-Ov, respectively.

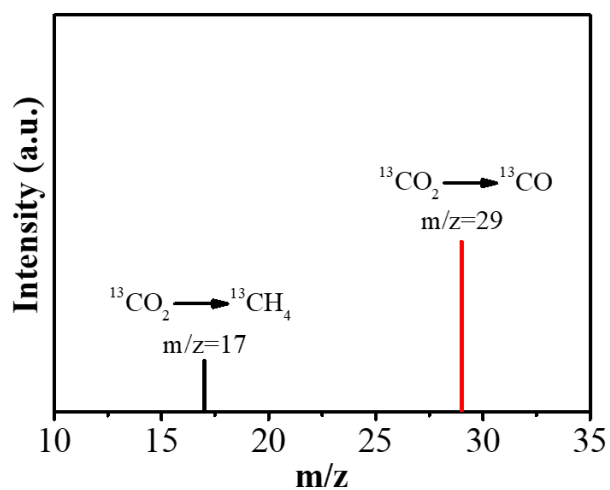

**Fig. S7.** GC-MS spectra analysis of  $^{13}\text{CO}_2$  to  $^{13}\text{CH}_4$  and  $^{13}\text{CO}$  using  $\text{CsPbBr}_3/\text{BiOBr-Ov-2}$  as a photocatalyst.

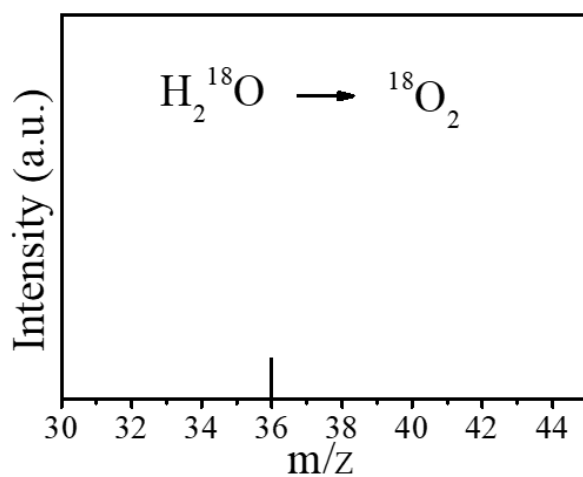

**Fig. S8.** Gas chromatogram and mass spectra (GC-MS) analysis for solar-driven oxidation of  $\text{H}_2^{18}\text{O}$  to  $^{18}\text{O}_2$  ( $m/z = 36$ ) using  $\text{CsPbBr}_3/\text{BiOBr-Ov-2}$  as a photocatalyst.

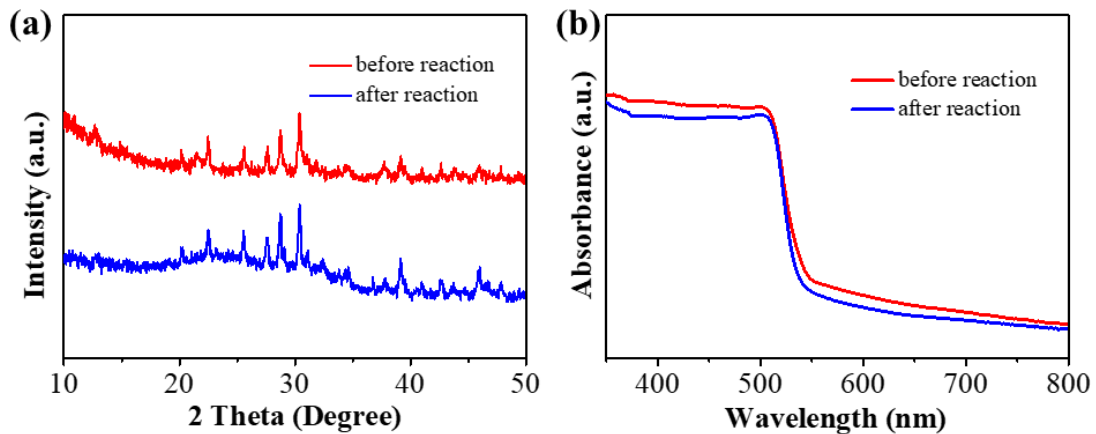

**Fig. S9.** (a) XRD patterns and (b) UV-vis DRS spectra of CsPbBr<sub>3</sub>/BiOBr-Ov-2 before and after cycling experiment.

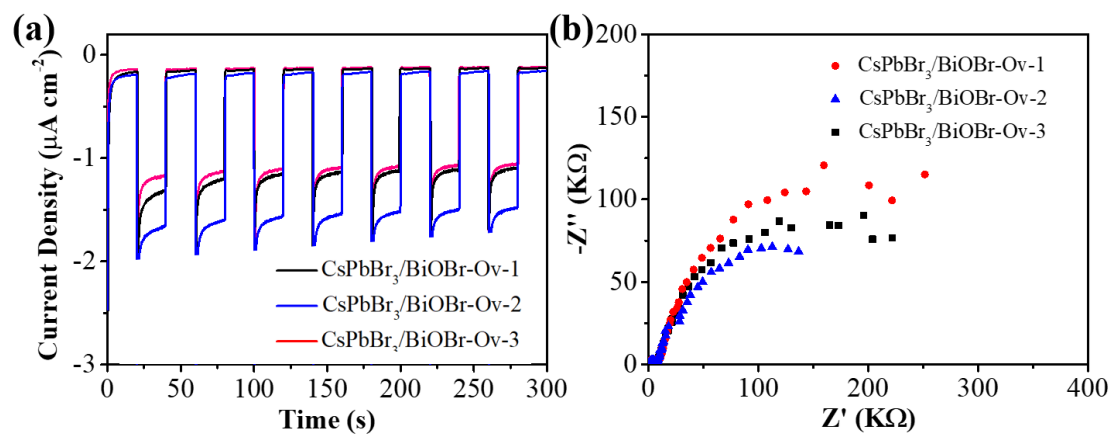

**Fig. S10.** (a) Transient photocurrent measurement and (b) EIS plot for as-prepared CsPbBr<sub>3</sub>/BiOBr-Ov sample.

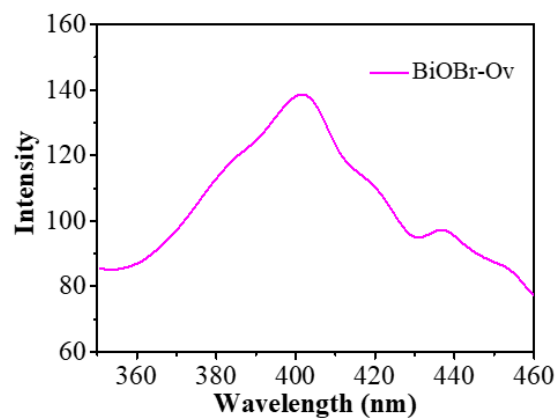

**Fig. S11.** Steady-state PL spectra of BiOBr-Ov.

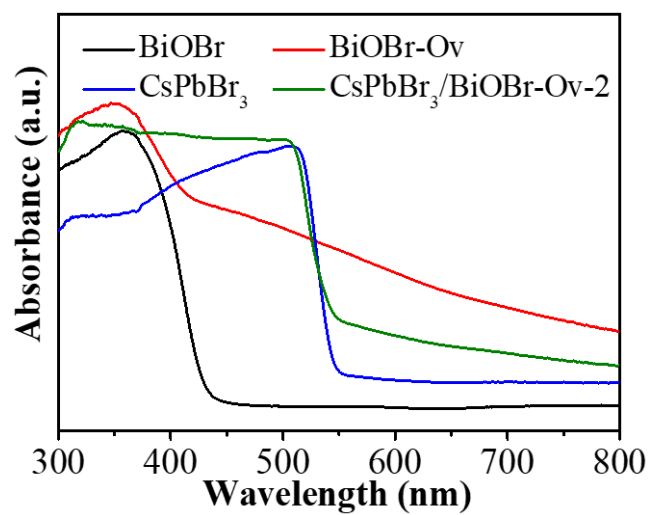

**Fig. S12.** UV-visible diffuse reflectance spectra of BiOBr, BiOBr-Ov, CsPbBr<sub>3</sub> and CsPbBr<sub>3</sub>/BiOBr-Ov-2, respectively.

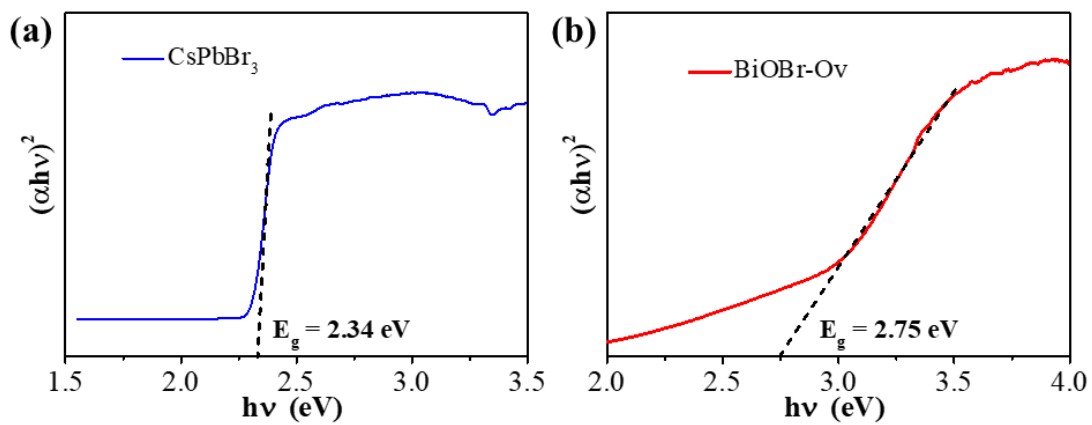

**Fig. S13.** Tauc-plot of (a) CsPbBr<sub>3</sub> and (b) BiOBr-Ov, respectively.

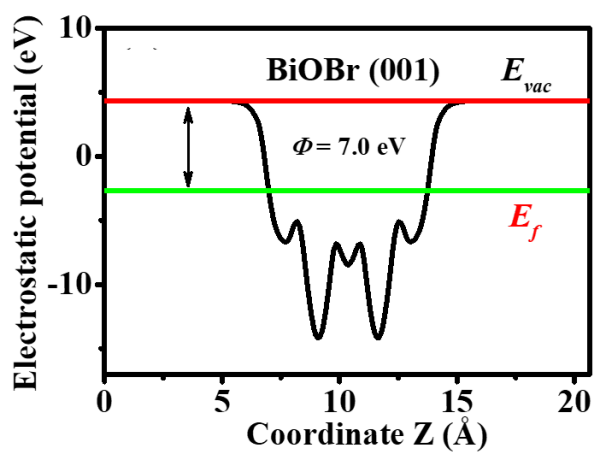

**Fig. S14.** The work functions of BiOBr.

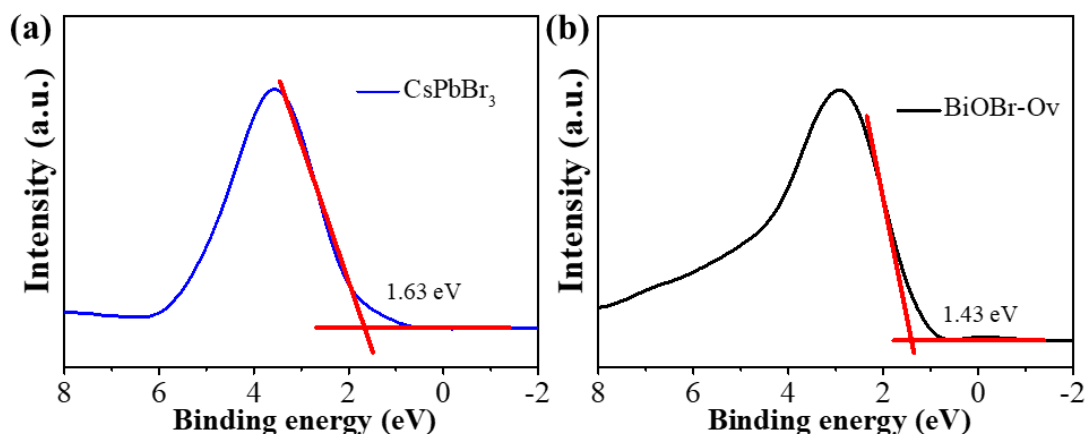

**Fig. S15.** XPS valence band spectra of (a) CsPbBr<sub>3</sub> and (b) BiOBr-Ov, respectively.

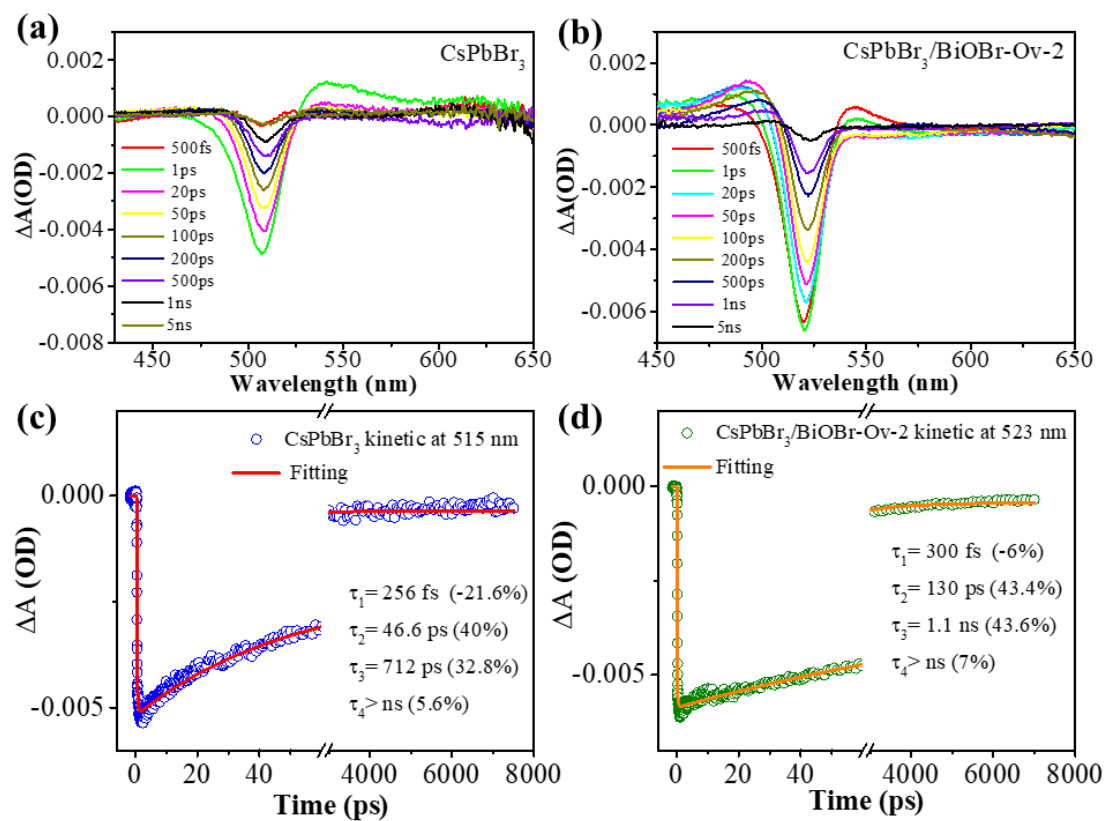

**Fig. S16.** Representative spectra at different delay time for the CsPbBr<sub>3</sub> QDs (a), CsPbBr<sub>3</sub>/BiOBr-Ov-2 (b) in the range of 500 fs-5 ns. The kinetic traces of CsPbBr<sub>3</sub> QDs for 515 nm (c) and CsPbBr<sub>3</sub>/BiOBr-Ov-2 for 523 nm (d) excited at 300 nm.

**Table S1.** The calculated CO<sub>2</sub> adsorption energy values on surfaces of BiOBr and BiOBr-Ov.

| Sample   | E(*) (eV) | E(CO <sub>2</sub> ) (eV) | E(*CO <sub>2</sub> ) (eV) | ΔE <sub>ads</sub> (eV) |
|----------|-----------|--------------------------|---------------------------|------------------------|
| BiOBr    | -247.767  | -22.9548                 | -270.924                  | -0.20205               |
| BiOBr-Ov | -239.621  | -22.9538                 | -262.947                  | -0.37069               |

**Table S2.** Summary of the CsPbBr<sub>3</sub> and BiOBr-based photocatalysts CO<sub>2</sub> reduction.

| photocatalyst                                           | Light source                             | Reduction medium            | Products (μmol g <sup>-1</sup> h <sup>-1</sup> ) |                 | R <sub>electron</sub> (μmol g <sup>-1</sup> h <sup>-1</sup> ) | Reference        |
|---------------------------------------------------------|------------------------------------------|-----------------------------|--------------------------------------------------|-----------------|---------------------------------------------------------------|------------------|
|                                                         |                                          |                             | CO                                               | CH <sub>4</sub> |                                                               |                  |
| SnS <sub>2</sub> /CsPbBr <sub>3</sub>                   | Xe lamp (λ=300–800 nm)                   | H <sub>2</sub> O            | 1.98                                             | --              | 3.96                                                          | [6]              |
| CPB@ZIF-8                                               |                                          | EA/H <sub>2</sub> O         | 1.52                                             | 5.43            | 15.5                                                          | [7]              |
| TiO <sub>2</sub> /CsPbBr <sub>3</sub>                   | 300 W Xe lamp (UV-vis light)             | ACN/H <sub>2</sub> O        | 9.02                                             |                 | 18.99                                                         | [8]              |
| CsPbBr <sub>3</sub> @ZIF-67                             | AM 1.5G, 150 mW cm <sup>-2</sup>         | gas solid phase, water      | 0.77                                             | 3.51            | 29.63                                                         | [9]              |
| CsPbBr <sub>3</sub> /GO                                 | 100 W Xe lamp, (AM 1.5G filter)          | Liquid-solid, ethyl acetate | 4.89                                             | 2.47            | 29.8                                                          | [10]             |
| CsPbBr <sub>3</sub> /NiFe-LDH                           |                                          |                             | 13.14                                            |                 | 39.58                                                         | [11]             |
| CsPbBr <sub>3</sub> /Au/TiO <sub>2</sub>                | A 300 W Xe lamp                          | H <sub>2</sub> O            | 17.27                                            | 1.22            | 44.3                                                          | [12]             |
| CsPbBr <sub>3</sub> /In <sub>2</sub> O <sub>3</sub>     | 300 W Xe lamp (AM 1.5G filter)           | EA/H <sub>2</sub> O         | 12.50                                            | 3.87            | 55.96                                                         | [13]             |
| BiOBr/Zn(OH) <sub>2</sub>                               | 300 W Xe lamp (λ>420 nm)                 | Liquid-solid, water         | 5.4                                              | --              | 10.8                                                          | [14]             |
| BiOCl/BiOBr                                             | 380 nm                                   | Liquid-solid, water         | 7.4                                              | --              | 14.8                                                          | [15]             |
| BiOBr/NH <sub>2</sub> -UiO-66                           | 300 W Xe lamp                            | Liquid-solid, water         | 9.19                                             | --              | 18.38                                                         | [16]             |
| BiOBr/TCN                                               | 300 W Xe lamp (λ>400 nm)                 | Liquid-solid, water         | 10.89                                            | --              | 21.78                                                         | [17]             |
| Co-BiOBr                                                | 300 W Xe lamp (λ>420 nm)                 | Liquid-solid, water         | 11.71                                            | --              | 23.42                                                         | [18]             |
| AgBr/BiOBr                                              | 300 W Xe lamp (λ>420 nm)                 | Liquid-solid, water         | 12.43                                            | --              | 24.86                                                         | [19]             |
| Bi <sub>19</sub> S <sub>27</sub> Br <sub>3</sub> /BiOBr | 300 W Xe lamp                            | Liquid-solid, water         | 19.83                                            | --              | 39.66                                                         | [20]             |
| CsPbBr <sub>3</sub> /BiOBr-Ov-2                         | 300 W Xe lamp (100 mW cm <sup>-2</sup> ) | EA/H <sub>2</sub> O         | 23.8                                             | 3.6             | 76.4                                                          | <b>This work</b> |

## References

- [1] P.E. Blöchl, Projector augmented-wave method, *Phys. Rev. B*, **1994**, 50, 17953-17979.
- [2] G. Kresse, D. Joubert, From ultrasoft pseudopotentials to the projector augmented-wave method, *Phys. Rev. B*, **1999**, 59, 1758-1775.
- [3] J.P. Perdew, K. Burke, M. Ernzerhof, Generalized Gradient Approximation Made Simple, *Phys. Rev. Lett.*, **1996**, 77, 3865-3868.
- [4] V. Wang, N. Xu, J.-C. Liu, G. Tang, W.-T. Geng, VASPKIT: A user-friendly interface facilitating high-throughput computing and analysis using VASP code, *Computer Physics Communications*, **2021**, 267, 108033.
- [5] S. Grimme, S. Ehrlich, L. Goerigk, Effect of the damping function in dispersion corrected density functional theory, **2011**, 32, 1456-1465.
- [6] R. Zhang, L. Li, Y. Li, D. Wang, Y. Lin, T. Xie, Z-scheme SnS<sub>2</sub>/CsPbBr<sub>3</sub> Heterojunctions for Photoreduction CO<sub>2</sub> Reaction and Related Photoinduced Carrier Behaviors, *Solar RRL*, **2022**, 6, 2200536.
- [7] Y. Xi, X. Zhang, Y. Shen, W. Dong, Z. Fan, K. Wang, S. Zhong, S. Bai, Aspect ratio dependent photocatalytic enhancement of CsPbBr<sub>3</sub> in CO<sub>2</sub> reduction with two-dimensional metal organic framework as a cocatalyst, *Appl. Catal. B Environ.*, **2021**, 297, 120411.
- [8] F. Xu, K. Meng, B. Cheng, S. Wang, J. Xu, J. Yu, Unique S-scheme heterojunctions in self-assembled TiO<sub>2</sub>/CsPbBr<sub>3</sub> hybrids for CO<sub>2</sub> photoreduction, *Nat. Commun.*, **2020**, 11, 4613.
- [9] Z.-C. Kong, J.-F. Liao, Y.-J. Dong, Y.-F. Xu, H.-Y. Chen, D.-B. Kuang, C.-Y. Su, Core@Shell CsPbBr<sub>3</sub>@Zeolitic Imidazolate Framework Nanocomposite for Efficient Photocatalytic CO<sub>2</sub> Reduction, *ACS Energy Lett.*, **2018**, 3, 2656-2662.
- [10] Y.F. Xu, M.Z. Yang, B.X. Chen, X.D. Wang, H.Y. Chen, D.B. Kuang, C.Y. Su, A CsPbBr<sub>3</sub> perovskite quantum dot/graphene oxide composite for photocatalytic CO<sub>2</sub> reduction, *J. Am. Chem. Soc.*, **2017**, 139, 5660-5663.
- [11] H. Sun, R. Tang, X. Zhang, S. Zhang, W. Yang, L. Wang, W. Liang, F. Li, R.

Zheng, J. Huang, Interfacial energy band engineered CsPbBr<sub>3</sub>/NiFe-LDH heterostructure catalysts with tunable visible light driven photocatalytic CO<sub>2</sub> reduction capability, *Catal. Sci. Technol.*, **2023**, *13*, 1154-1163.

[12] W. Song, K.C. Chong, G. Qi, Y. Xiao, G. Chen, B. Li, Y. Tang, X. Zhang, Y. Yao, Z. Lin, Z. Zou, B. Liu, Unraveling the Transformation from Type-II to Z-Scheme in Perovskite-Based Heterostructures for Enhanced Photocatalytic CO<sub>2</sub> Reduction, *J. Am. Chem. Soc.*, **2024**, *146*, 3303-3314.

[13] J. Ding, X. Deng, J. Fan, Y. Wang, Z. Li, Q. Liang, Embedding CsPbBr<sub>3</sub> Quantum Dots into an In<sub>2</sub>O<sub>3</sub> Nanotube for Selective Photocatalytic CO<sub>2</sub> Reduction to Hydrocarbon Fuels, *Inorg. Chem.*, **2023**, *62*, 16493-16502.

[14] W. Qin, Q. Yang, H. Ye, Y. Xie, Z. Shen, Y. Guo, Y. Deng, Y. Ling, J. Yu, G. Luo, N. Raza, W. Raza, J. Zhao, Novel 2D/2D BiOBr/Zn(OH)<sub>2</sub> photocatalysts for efficient photoreduction CO<sub>2</sub>, *Separation and Purification Technology*, **2023**, *306*, 122721.

[15] Y. Wu, M. Xu, Y. Wang, B. Hu, Y. Xie, Y. Ling, BiOCl/BiOBr composites for efficient photocatalytic carbon dioxide reduction, *Applied Catalysis A: General*, **2024**, *677*, 119708.

[16] J. Liu, W. Qin, Y. Wang, Q. Xu, Y. Xie, Y. Chen, Y. Dai, W. Zhang, NH<sub>2</sub>-UiO-66 modification BiOBr enhancement photoreduction CO<sub>2</sub> to CO, *Separation and Purification Technology*, **2024**, *344*, 127289.

[17] W. Tao, Q. Tang, J. Hu, Z. Wang, B. Jiang, Y. Xiao, R. Song, S. Guo, Construction of a hierarchical BiOBr/C<sub>3</sub>N<sub>4</sub> S-scheme heterojunction for selective photocatalytic CO<sub>2</sub> reduction towards CO, *J. Mater. Chem. A*, **2023**, *11*, 24999-25007.

[18] Y. Xie, Y. Wang, Y. Zhou, F. Wang, Y. Xu, S. Rao, J. Zhao, Cation exchange strategy to construct Co-doped BiOBr nanosheets for high-efficient photocatalytic CO<sub>2</sub> to CO, *Applied Catalysis A: General*, **2024**, *669*, 119504.

[19] Y. Xie, Y. Zhou, C. Gao, L. Liu, Y. Zhang, Y. Chen, Y. Shao, Construction of AgBr/BiOBr S-scheme heterojunction using ion exchange strategy for high-efficiency reduction of CO<sub>2</sub> to CO under visible light, *Separation and Purification Technology*, **2022**, *303*, 122288.

[20] J. Zhao, M. Xue, M. Ji, B. Wang, Y. Wang, Y. Li, Z. Chen, H. Li, J. Xia,

“Electron collector” Bi<sub>19</sub>S<sub>27</sub>Br<sub>3</sub> nanorod-enclosed BiOBr nanosheet for efficient CO<sub>2</sub> photoconversion, *Chin. J. Catal.*, **2022**, *43*, 1324-1330.
